# Supplementary material for: What about the mothers? An analysis of maternal mortality and morbidity in perinatal health surveillance systems in Europe
Source: PubMed Central journal article supplement (PMC3472023; doi:10.1111/j.1471-0528.2012.03330.x), 2012-06
Supplement: bjo0119-0880-SD1.pdf [file bjo0119-0880-SD1.pdf]

**Appendix S1: Data sources used for maternal mortality and morbidity statistics in the EURO-PERISTAT project**

| Countries       | Sources for maternal mortality data                                                       |                                                                                                                                                  | Data source for maternal morbidity                                     |
|-----------------|-------------------------------------------------------------------------------------------|--------------------------------------------------------------------------------------------------------------------------------------------------|------------------------------------------------------------------------|
|                 | Routinely collected data                                                                  | Confidential enquiries or enhanced systems of collection                                                                                         |                                                                        |
| Austria         | Cause of death statistics                                                                 | Statistics Austria and Confidential enquiries to Departments of Gynaecology and Obstetrics and the Institutes of Pathology and Forensic medicine | --                                                                     |
| Belgium         | Flanders + Brussels vital records                                                         |                                                                                                                                                  | SPE – birth register                                                   |
| Czech Republic  | Czech Statistical Office, death certificates                                              |                                                                                                                                                  | Database of aggregated data of the Czech Society of Perinatal Medicine |
| Denmark         | National register No data by cause                                                        | National Medical Registers                                                                                                                       | Danish perinatal database                                              |
| Estonia         | Statistics Estonia(death registry for causes of deaths) + Estonian medical birth registry | Death certificates                                                                                                                               | Estonian medical birth registry                                        |
| Finland         | Cause-of-Death Register                                                                   | Cause of Death Register, Medical Birth Register, Hospital Discharge Register, Abortion Register                                                  | Hospital Discharge Register                                            |
| France          | National statistics of causes of death                                                    | National Expert Committee on Maternal Mortality                                                                                                  | PMSI – Hospital Discharge Data                                         |
| Germany         | www.bqs-online.de (Quality register) & www.destatis.de (National statistics)              |                                                                                                                                                  | Hospital quality birth register<br>www.bqs-online.de                   |
| Greece          | --                                                                                        |                                                                                                                                                  | --                                                                     |
| Hungary         | National Institute of Obstetrics and Gynecology                                           |                                                                                                                                                  | National Institution of Obstetrics and Gynecology                      |
| Ireland         | --                                                                                        |                                                                                                                                                  | --                                                                     |
| Italy           | National Register of Deaths - Istat National Institute of Statistics                      | National Institute of Health and five collaborative regions                                                                                      | SDO (Scheda di Dimissione Ospedaliera, or Hospital Discharge Form)     |
| Latvia          | Mortality statistics / Ministry of health                                                 |                                                                                                                                                  | Newborns Register of Latvia                                            |
| Lithuania       | Database of the Demographic Statistics, death certificates                                |                                                                                                                                                  | --                                                                     |
| Luxembourg      | Mortality statistics / Ministry of health                                                 |                                                                                                                                                  | --                                                                     |
| Malta           | National Mortality Register                                                               |                                                                                                                                                  | National Obstetrics Information System (NOIS)                          |
| The Netherlands | Audit Committee on maternal mortality                                                     | Dutch Maternal Mortality Committee                                                                                                               | LEMMoN Study                                                           |
| Norway          | Medical birth registry of Norway                                                          | Cause of Death Registry, Statistics Norway and the Medical Birth Registry of Norway                                                              | Medical birth registry of Norway                                       |
| Poland          | Central Statistic Office                                                                  |                                                                                                                                                  | Hospital discharge data                                                |
| Portugal        | INE - Estatísticas Demográficas                                                           |                                                                                                                                                  | --                                                                     |

**Appendix S1. (continued)**

| Countries      | Sources for maternal mortality data                                                       |                                                                                                          | Data source for maternal morbidity                           |
|----------------|-------------------------------------------------------------------------------------------|----------------------------------------------------------------------------------------------------------|--------------------------------------------------------------|
|                | Routinely collected data                                                                  | Confidential enquiries or enhanced systems of collection                                                 |                                                              |
| Slovakia       | --                                                                                        |                                                                                                          | --                                                           |
| Slovenia       | Mortality database, The Institute of Public Health of the Republic of Slovenia            | 2003-2005: National Perinatal Information System, Information system on Fetal death, Mortality Data base | National perinatal system of Slovenia                        |
| Spain          | National Institute for Statistics. Mortality Register                                     |                                                                                                          | CMBD (Hospital Registers including private hospitals)        |
| Sweden         | Cause of death register                                                                   |                                                                                                          | --                                                           |
| United Kingdom | Civil registration of births and deaths for England and Wales, Scotland, Northern Ireland | Centre for Maternal and Child Health Enquiries                                                           | Scottish Morbidity Record SMR and Patient Episode Data Wales |
